# Supplementary material
Source: HighWire-hosted journal article supplement (https://www.cmajopen.ca/highwire/filestream/81339/field_highwire_adjunct_files/6/2020-0098-7-at.pdf)
Supplement: 2020-0098-7-at.pdf [file 2020-0098-7-at.pdf]

**Appendix 7 (as supplied by the authors):**

Supplementary Table S6 – Average wait time characteristics of a centralized hub virtual assessment service under staffing models of 1,2 or 3 physicians working simultaneously.

Estimate based on estimated daily call volume (26.9) across 7 GEMINI hospitals.

|           | <b>Avg daily volume</b> | <b># Physician staff</b> | <b>Ave wait time (min)</b> | <b>90<sup>th</sup> percentile (min)</b> |
|-----------|-------------------------|--------------------------|----------------------------|-----------------------------------------|
| All Sites | 26.9 [23, 30.9]         | 1                        | 178 [175.8, 180.3]         | 406.1 [400.3, 412]                      |
|           |                         | 2                        | 10.8 [10.6, 10.9]          | 38.1 [37.7, 38.6]                       |
|           |                         | 3                        | 1.7 [1.6, 1.7]             | 1.6 [1.4, 1.8]                          |
